# Supplementary material
Source: PubMed Central journal article supplement (PMC3386614)
Supplement: NIHMS384101-supplement-SI.pdf [file NIHMS384101-supplement-SI.pdf]

# Chromophore Formation in Resorcinarene Solutions and the Visual Detection of Mono- and Oligosaccharides

*Ming He, Rolanda J. Johnson, Jorge O. Escobedo, Patricia A. Beck, Kyu Kwang Kim, Nadia N. St. Luce, Claude J. Davis, Patrick T. Lewis, Frank R. Fronczek, Bruce J. Melancon, Anthony A. Mrse, W. Dale Treleaven and Robert M. Strongin\**

Contribution from the Department of Chemistry, Louisiana State University, Baton Rouge, LA 70803

## Supporting Information

## Table of Crystallographic Data for Compound 7.

|                                        |                                                                      |
|----------------------------------------|----------------------------------------------------------------------|
| Compound                               | 7•2MeOH                                                              |
| Formula                                | C <sub>32</sub> H <sub>32</sub> O <sub>8</sub> •2 CH <sub>3</sub> OH |
| Color/shape                            | colorless fragment                                                   |
| Formula weight                         | 608.7                                                                |
| Crystal system                         | Orthorhombic                                                         |
| Space group                            | Pnma                                                                 |
| Temp., K                               | 120                                                                  |
| Cell constants                         |                                                                      |
| a, Å                                   | 14.0627(4)                                                           |
| b, Å                                   | 13.6940(4)                                                           |
| c, Å                                   | 16.0505(5)                                                           |
| Cell volume, Å <sup>3</sup>            | 3090.92(16)                                                          |
| Formula units/unit cell                | 4                                                                    |
| D <sub>calc</sub> , g cm <sup>-3</sup> | 1.308                                                                |
| μ <sub>calc</sub> , cm <sup>-1</sup>   | 0.96                                                                 |
| Diffractometer / scan                  | Nonius KappaCCD/ ω                                                   |
| Radiation, graphite monochr.           | MoKα (λ = 0.71073 Å)                                                 |
| Max. crystal dimensions, mm            | 0.27 x 0.37 x 0.42                                                   |
| Reflections measured                   | 14,994                                                               |
| R <sub>int</sub>                       | 0.037                                                                |
| Independent reflections                | 4660                                                                 |

|                                         |                          |
|-----------------------------------------|--------------------------|
| 2 $\theta$ range, deg                   | 5 < 2 $\theta$ < 60      |
| Range of h,k,l                          | $\pm 19, \pm 19, \pm 22$ |
| Reflections observed                    | 3626                     |
| Criterion for observed                  | I > 2 $\sigma$ (I)       |
| Data/parameters                         | 4660/240                 |
| R (obs)                                 | 0.064                    |
| R(all data)                             | 0.090                    |
| GOF                                     | 1.116                    |
| Max resid. peaks (e $\text{\AA}^{-3}$ ) | 0.39, -0.61              |
